# Supplementary material
Source: PubMed Central journal article supplement (PMC515102)

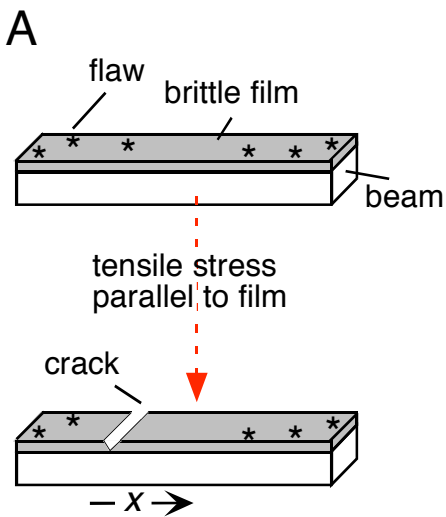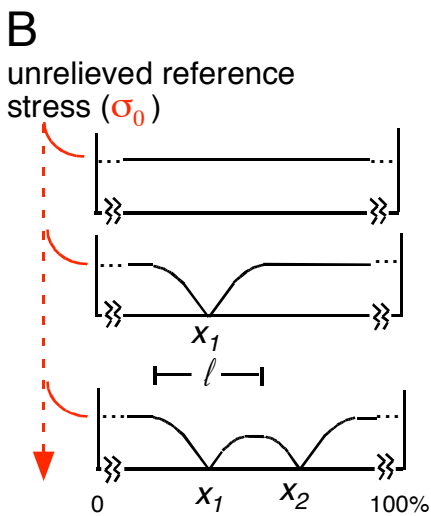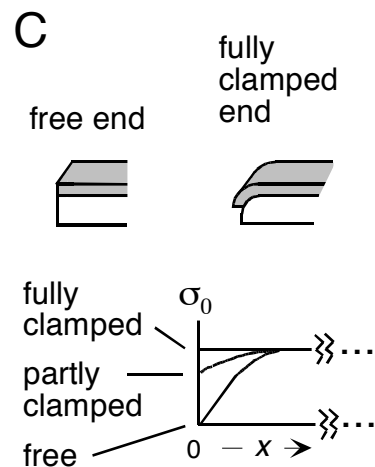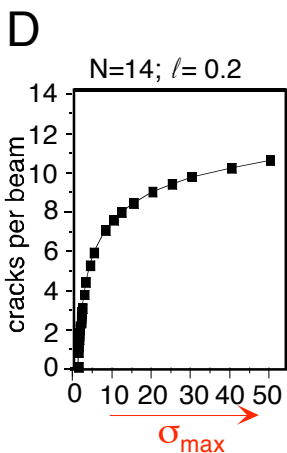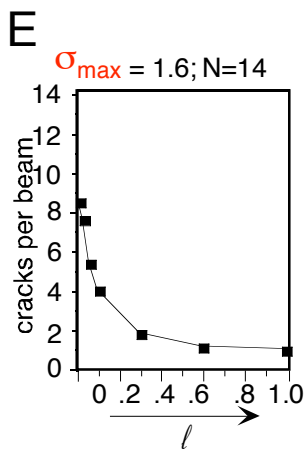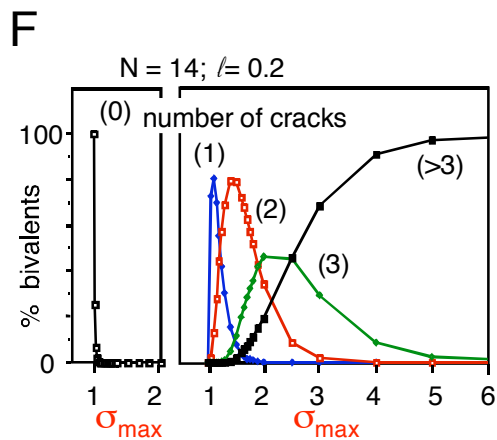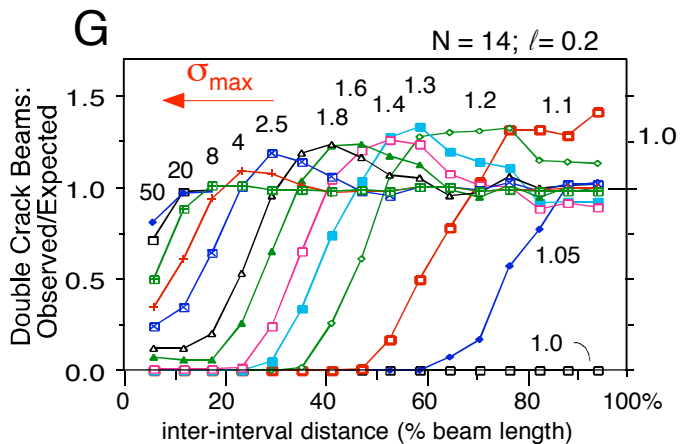

Supplement: pnas_101_34_12592__1.pdf [file pnas_101_34_12592__1.pdf]

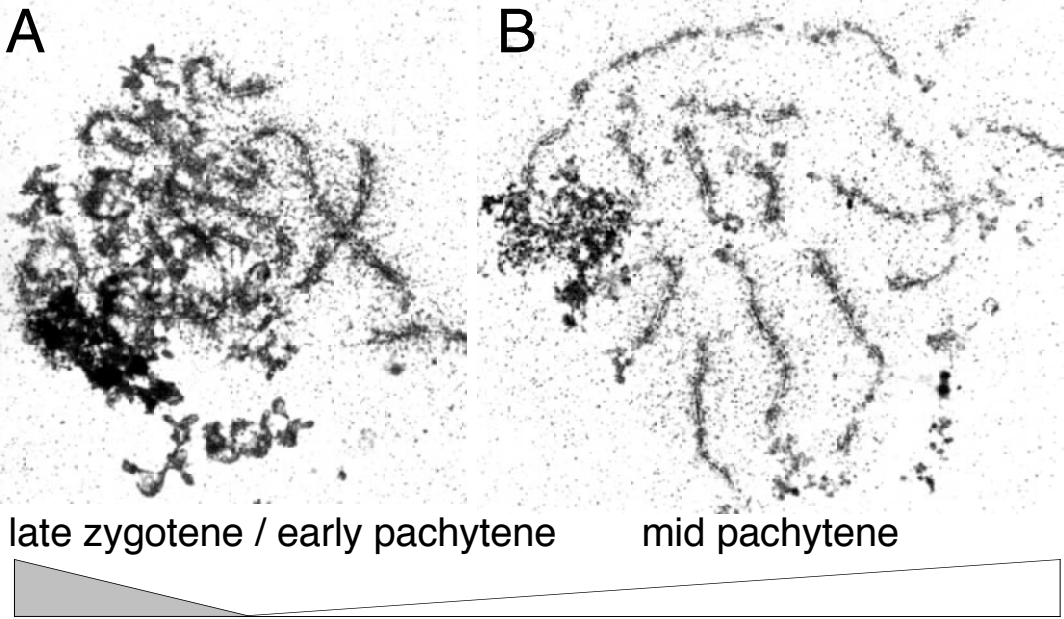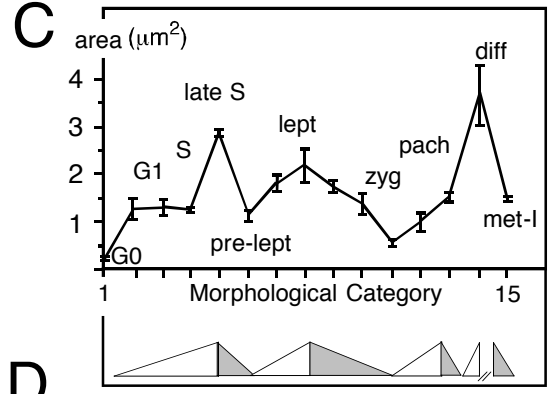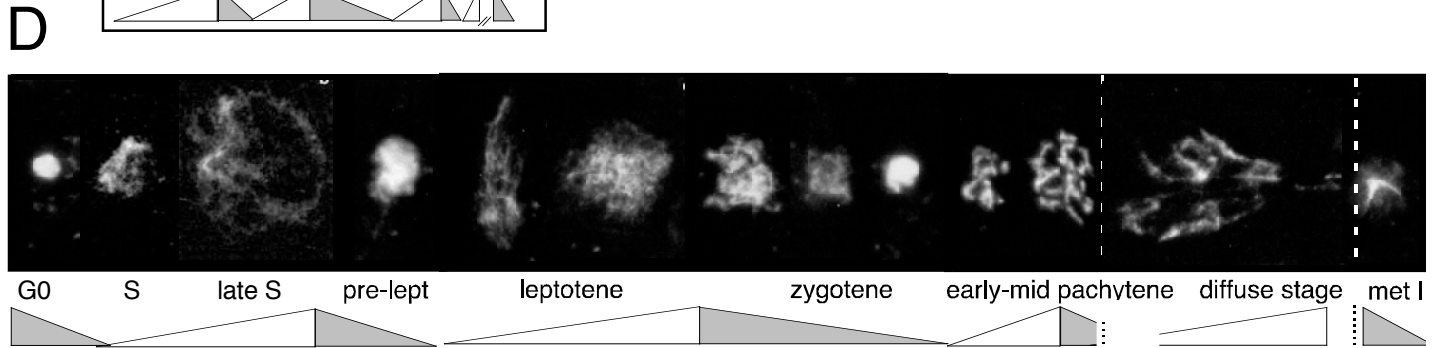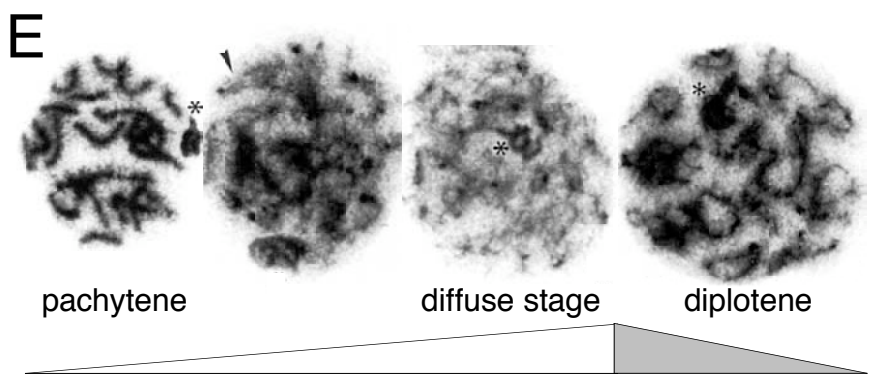

Supplement: pnas_101_34_12592__3.pdf [file pnas_101_34_12592__3.pdf]

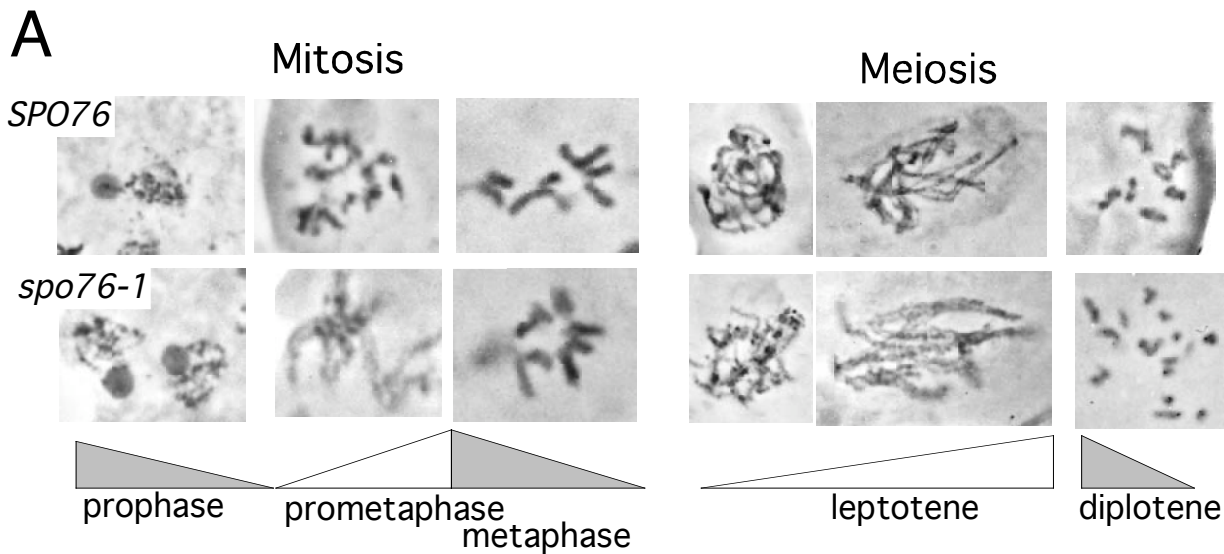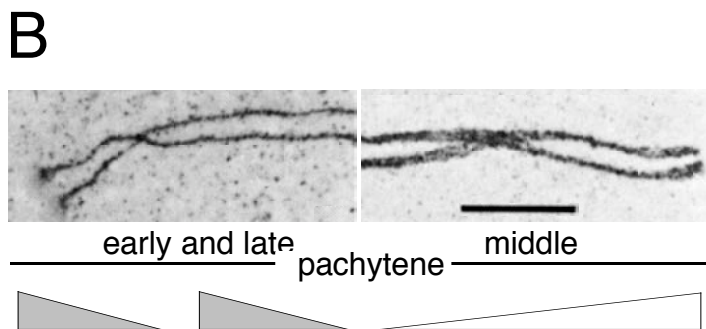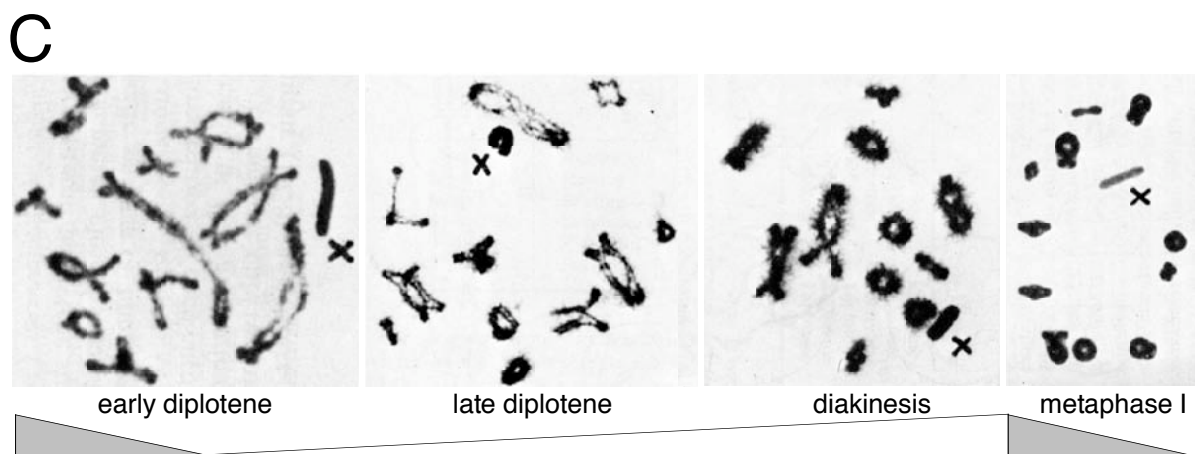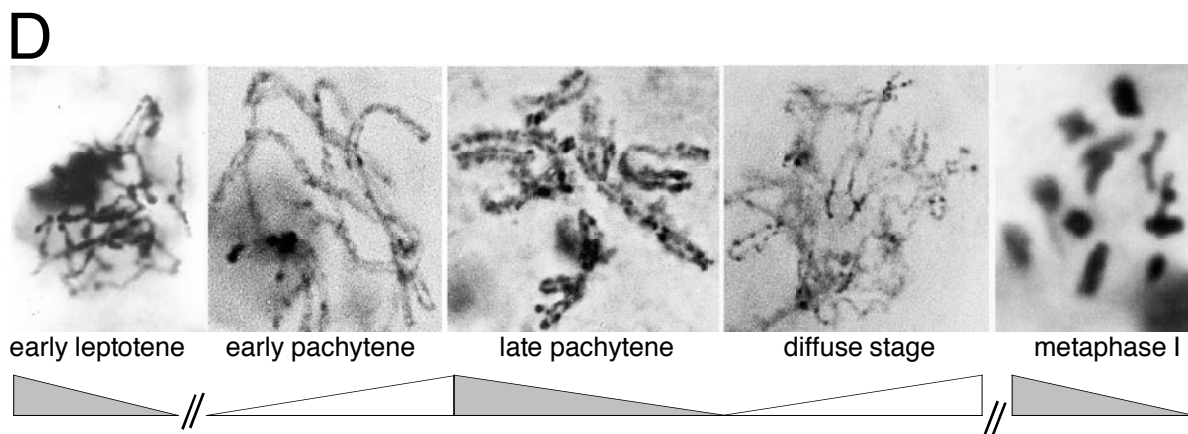

Supplement: pnas_101_34_12592__4.pdf [file pnas_101_34_12592__4.pdf]

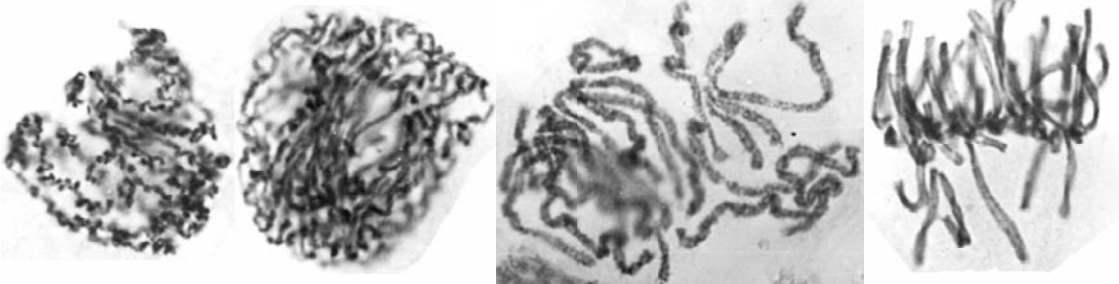

prophase

prometaphase

metaphase

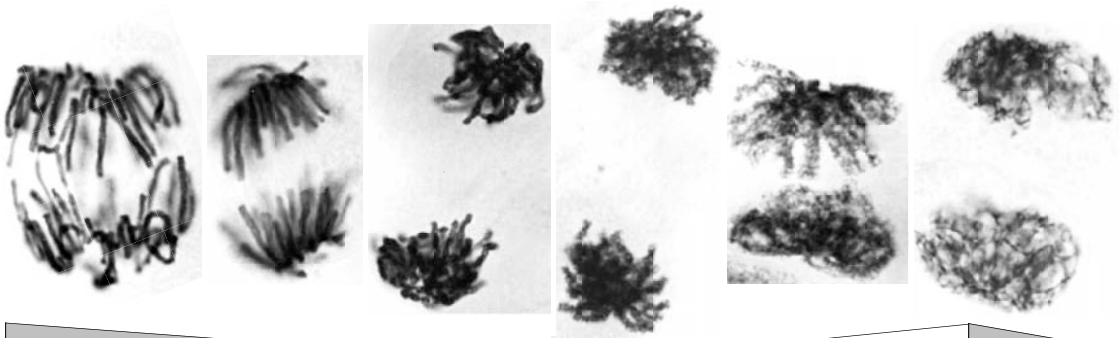

anaphase

telophase onset

telophase

>> G1

Supplement: pnas_101_34_12592__5.pdf [file pnas_101_34_12592__5.pdf]

### A. mitosis

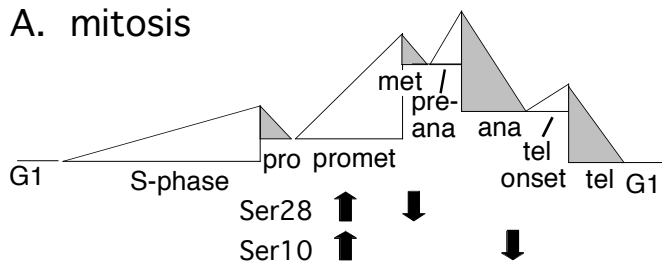

### B. meiosis

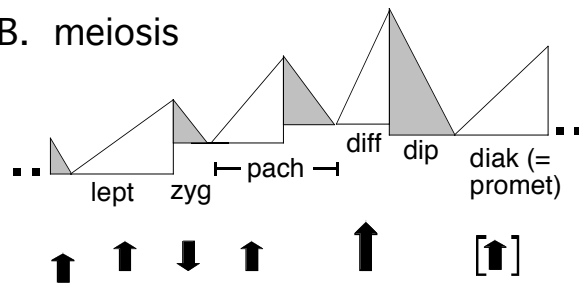

### C. mitosis

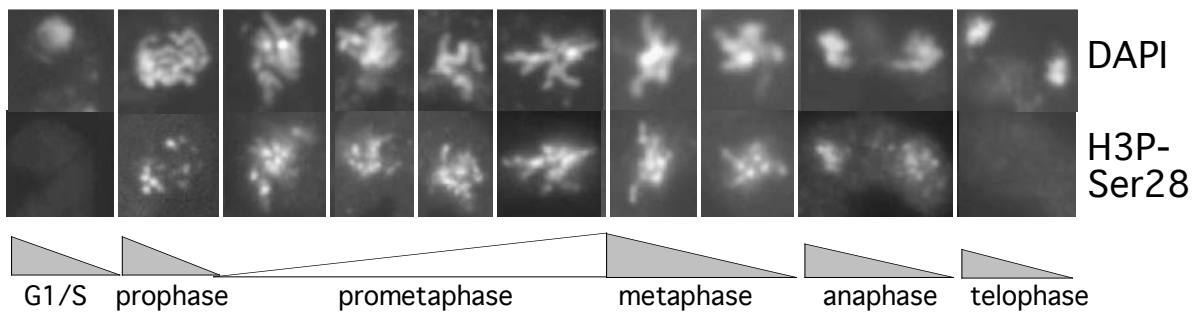

### D. meiosis

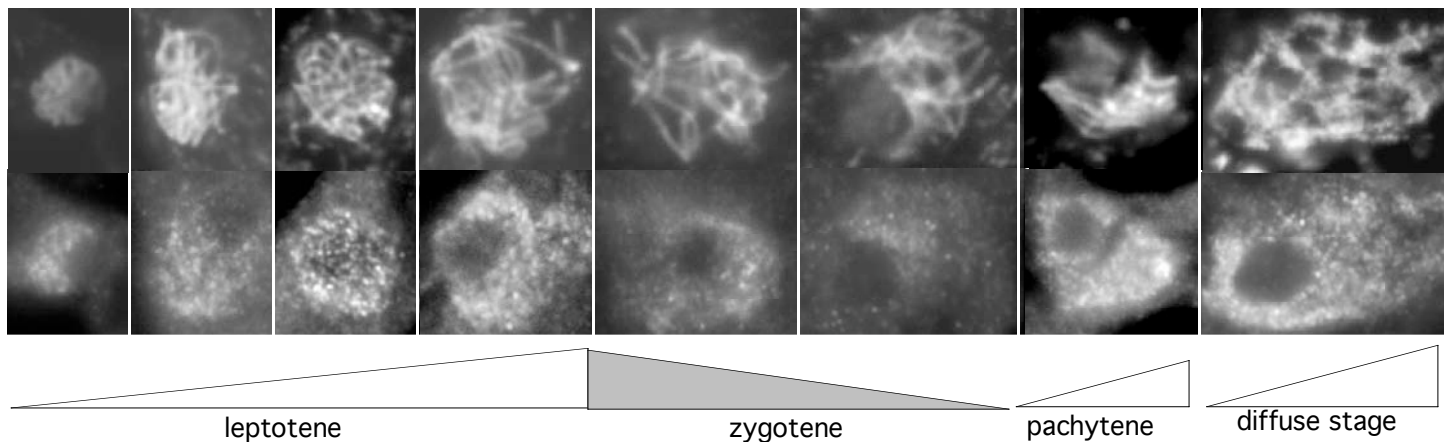

Supplement: pnas_101_34_12592__6.pdf [file pnas_101_34_12592__6.pdf]
